# Supplementary material for: DNA adsorption by magnetic iron oxide nanoparticles and its application for arsenate detection
Source: Royal Society of Chemistry journal article supplement (doi:10.1039/c4cc03264k), 2014-06-10
Supplement: c4cc03264k1.pdf [file c4cc03264k1.pdf]

## Supporting Information

# **DNA adsorption by magnetic iron oxide nanoparticles and its application for arsenate detection**

Biwu Liu and Juewen Liu\*

Department of Chemistry, Waterloo Institute for Nanotechnology

University of Waterloo

200 University Ave West, Waterloo, Ontario, Canada, N2L 3G1

Fax: (+1) 519-746-0435

*E-mail: liujw@uwaterloo.ca*

## Experimental Section

**Chemicals.** All of the DNA samples were purchased from Integrated DNA Technologies (IDT, Coralville, IA) and were purified by standard desalting. The FAM-labeled 24-mer DNA sequence is FAM-ACGCATCTGTGAAGAGAACCTGGG. For the DNA homopolymers, FAM was labeled on the 5'-end. Fe<sub>3</sub>O<sub>4</sub> NPs, NaI, NaBr, Na<sub>2</sub>SO<sub>4</sub>, Na<sub>2</sub>SO<sub>3</sub> and NaClO<sub>4</sub> were purchased from Sigma-Aldrich. Sodium phosphate, 4-(2-hydroxyethyl)-1-piperazineethanesulfonic acid (HEPES), sodium acetate, sodium nitrate, and all the ribonucleosides were purchased from Mandel Scientific (Guelph, Ontario, Canada). Milli-Q water was used for preparing all the solutions and buffers.

**Characterization of Fe<sub>3</sub>O<sub>4</sub> NPs.** To measure the  $\zeta$ -potential of Fe<sub>3</sub>O<sub>4</sub> NPs, 100  $\mu$ g/mL Fe<sub>3</sub>O<sub>4</sub> NPs was dispersed in 10 mM buffer (HEPES, pH 7.6). The  $\zeta$ -potential was then recorded using Zetasizer Nano 90 (Malvern). The TEM image was acquired on a Philips CM10 transmission electron microscope. The absorption spectrum of Fe<sub>3</sub>O<sub>4</sub> NPs (dispersed in 5 mM HEPES, pH 7.6) was measured by a UV-vis spectroscopy instrument (Agilent 8453A).

**DNA adsorption by Fe<sub>3</sub>O<sub>4</sub>.** To study the effect of DNA length, 50 nM FAM-labeled DNA (A<sub>5</sub>, A<sub>15</sub>, or A<sub>30</sub>) was dissolved in buffer A (10 mM HEPES, pH 7.6, 300 mM NaCl). The fluorescence was recorded by a microplate reader (Infinite F200 Pro, Tecan). After adding Fe<sub>3</sub>O<sub>4</sub> NPs (final concentration = 25  $\mu$ g/mL) and 30 min incubation, the fluorescence was recorded and compared to the initial intensity to calculate the adsorbed DNA. This buffer condition and Fe<sub>3</sub>O<sub>4</sub> NPs concentration were for all the experiment unless otherwise indicated. To test the effect of DNA sequence, 10 nM FAM-A<sub>15</sub>, T<sub>15</sub>, C<sub>15</sub>, or G<sub>15</sub> was used. The adsorption kinetics were recorded for 30 min after a quick addition of Fe<sub>3</sub>O<sub>4</sub> NPs. For the displacement experiment, 2 mM phosphate or thymidine was added to the FAM-T<sub>15</sub>/Fe<sub>3</sub>O<sub>4</sub> NPs conjugate in buffer A followed by fluorescence recording for 40 min. To obtain the adsorption isotherm, FAM-C<sub>15</sub> was used.

**Arsenate detection (method 1).** The sensor was prepared by adsorbing FAM-C<sub>15</sub> (30 nM) onto Fe<sub>3</sub>O<sub>4</sub> NPs (25  $\mu$ g/mL) in buffer A in a total volume of 10 mL. The adsorption was allowed to take place for 1 h. This mixture was then divided into 100  $\mu$ L aliquots in a 96-well plate. Then a small volume (1-5  $\mu$ L) of arsenate with designed concentrations was added into 100  $\mu$ L of the conjugate to induce desorption. The kinetics were obtained by monitoring the fluorescence for 3 h in triplicate. For the selectivity test, a final concentration of 10  $\mu$ M anions (arsenate, arsenite, phosphate, bromide, iodide, nitrate, perchlorate, acetate, carbonate, sulfate, or sulfite) were added, and the fluorescence was recorded after 1 h. The detection of arsenate (10  $\mu$ M) in the presence of high anion concentration (1 mM) was also tested. To mask the phosphate signal, phosphate or arsenate (1 mM) was treated with BaCl<sub>2</sub> (5 mM) in

the presence of NaOH (20 mM). After 10 min incubation, the samples were centrifuged (15,000 rpm) for 5 min. Then 1  $\mu$ L of the supernatant was added into FAM-C<sub>15</sub>/Fe<sub>3</sub>O<sub>4</sub> NPs dispersion. The fluorescence was recorded after 1 h.

**Arsenate detection (method 2).** Alternatively, Fe<sub>3</sub>O<sub>4</sub> NPs (25  $\mu$ g/mL) were incubated with various concentrations of arsenate in buffer A with a volume of 10 mL for 1 h. After that, the samples were agitated to fully disperse the Fe<sub>3</sub>O<sub>4</sub> NPs, and 100  $\mu$ L was taken out to mix with FAM-C<sub>15</sub> probe DNA (30 nM). The fluorescence was measured after 1 h incubation.

### TEM characterization.

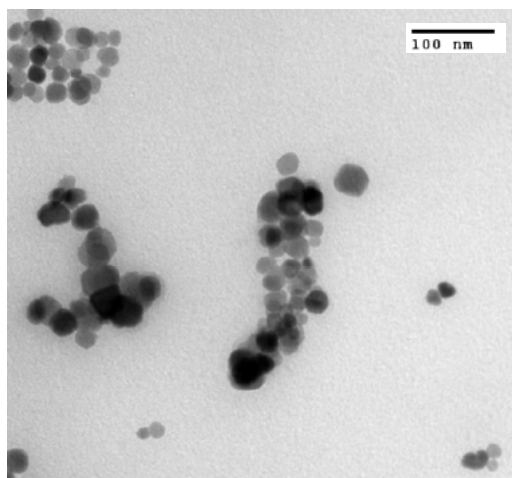

**Figure S1.** TEM micrograph of Fe<sub>3</sub>O<sub>4</sub> NPs used in this work.

**NaCl-dependent DNA adsorption.** Almost no DNA was adsorbed in the absence of salt (black trace, Figure S2). Significant fluorescence drop indicating DNA adsorption was observed with just 30 mM NaCl. Further increase of NaCl concentration promoted adsorption slightly. We chose to use 300 mM NaCl for most of our experiments.

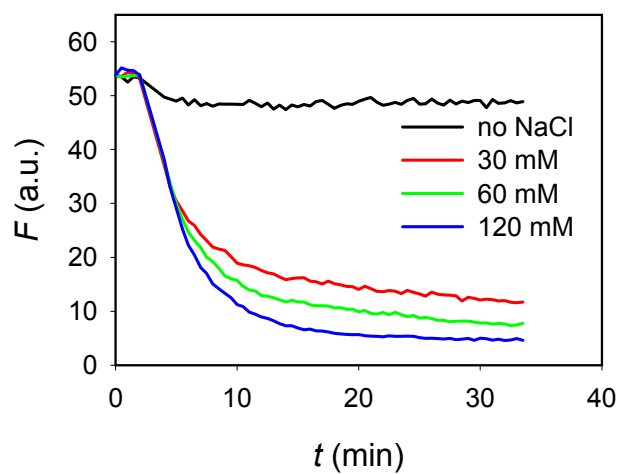

**Figure S2.** Adsorption kinetics of FAM-labeled 24-mer DNA by  $\text{Fe}_3\text{O}_4$  NPs in the presence of different NaCl concentrations.

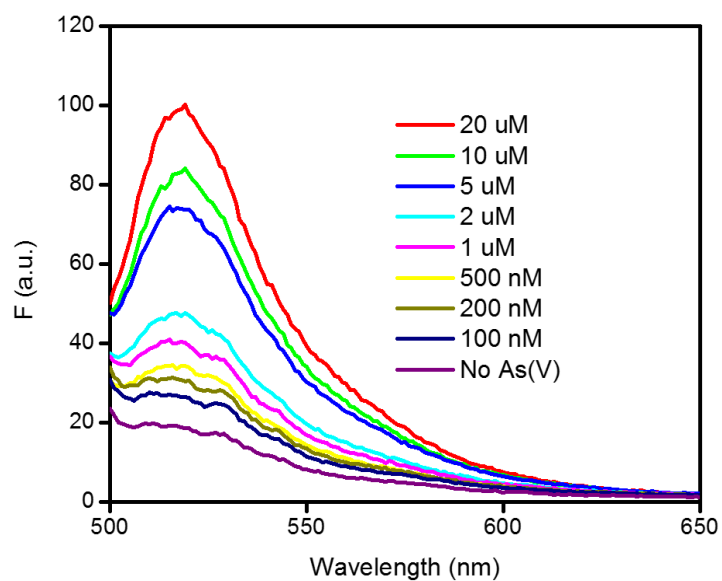

**Figure S3.** Fluorescence spectra of the sensors for detecting arsenate by adsorbing arsenate first before the addition of DNA.

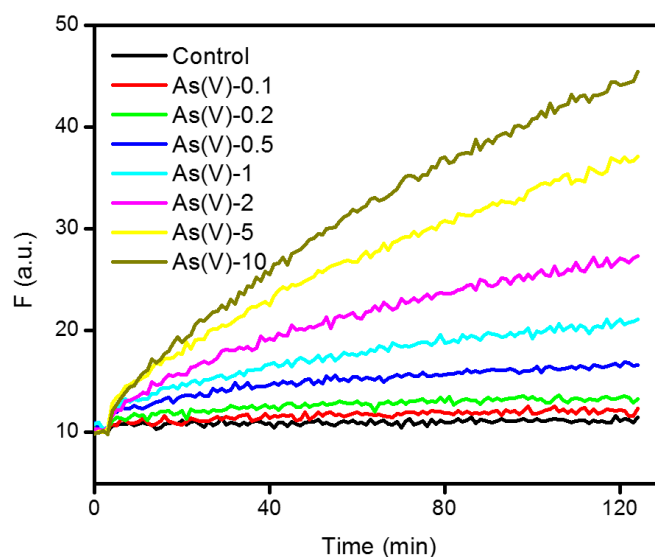

**Figure S4.** Response of DNA/Fe<sub>2</sub>O<sub>3</sub> to various concentrations of arsenate (unit =  $\mu$ M).

**Table S1.** Literature reported sensors for arsenic detection.

| Target Ions                            | Method                                                         | LOD       | Reference                                                                                                          |
|----------------------------------------|----------------------------------------------------------------|-----------|--------------------------------------------------------------------------------------------------------------------|
| <b>As(III)</b><br><b>Reduced As(V)</b> | Colorimetric assay, UV-vis                                     | 2.5 ppb   | Domínguez-González, R.; Varela, L.; Bermejo-Barrera, P. <i>Talanta</i> 2014.                                       |
| <b>As(III)</b>                         | Colorimetric, UV-vis                                           | 2.5 ppb   | Liang, R.-P.; Wang, Z.-X.; Zhang, L.; Qiu, J.-D. <i>Chemistry (Weinheim an der Bergstrasse, Germany)</i> 2013      |
|                                        | Light Scattering                                               | 0.5 ppb   |                                                                                                                    |
| <b>As(III)</b>                         | Colorimetric, UV-vis                                           | 5.3 ppb   | Wu, Y.; Zhan, S.; Wang, F.; He, L.; Zhi, W.; Zhou, P. <i>Chemical Communications</i> 2012.                         |
| <b>As(III)</b>                         | Colorimetric, UV-vis                                           | 20 nM     | Xia, N.; Shi, Y.; Zhang, R.; Zhao, F.; Liu, F.; Liu, L. <i>Analytical Methods</i> 2012, 4, 3937–3941.              |
| <b>As(III)</b>                         | Resonance Rayleigh Scattering                                  | 0.2 ppb   | Wu, Y.; Zhan, S.; Xing, H.; He, L.; Xu, L.; Zhou, P. <i>Nanoscale</i> 2012.                                        |
| <b>As(III)</b>                         | Colorimetric, UV-vis                                           | 0.6 ppb   | Wu, Y.; Liu, L.; Zhan, S.; Wang, F.; Zhou, P. <i>The Analyst</i> 2012.                                             |
| <b>As(III)</b>                         | Fluorescence                                                   | 0.24 ppb  | Ezeh, V.; Harrop, T. <i>Inorganic Chemistry</i> 2012.                                                              |
| <b>As(III)</b>                         | Fluorescence, Confocal microscope and cryo-electron microscopy | femtogram | Liu, R.; Chen, Z.; Wang, Y.; Cui, Y.; Zhu, H.; Huang, P.; Li, W.; Zhao, Y.; Tao, Y.; Gao, X. <i>ACS Nano</i> 2011. |
| <b>As(III)</b>                         | Fluorescence                                                   | 20 nM     | Wang, X.; Lv, Y.; Hou, X. <i>Talanta</i> 2011.                                                                     |

|                                  |              |              |                                                                                                                                                                                                                                              |
|----------------------------------|--------------|--------------|----------------------------------------------------------------------------------------------------------------------------------------------------------------------------------------------------------------------------------------------|
| <b>As(III)</b>                   | SERS         | 0.76 ppb     | Li, J.; Chen, L.; Lou, T.; Wang, Y. <i>ACS applied materials &amp; interfaces</i> 2011.                                                                                                                                                      |
| <b>As(III)<br/>Reduced As(V)</b> | Colorimetric | 1 ppb        | Kalluri, J. R.; Arbneshti, T.; Khan, S. A.; Neely, A.; Candice, P.; Varisli, B.; Washington, M.; McAfee, S.; Robinson, B.; Banerjee, S.; Singh, A. K.; Senapati, D.; Ray, P. C. <i>Angewandte Chemie (International ed. in English)</i> 2009 |
|                                  | DLS          | 3 ppt        |                                                                                                                                                                                                                                              |
| <b>As(V)<br/>As(III)</b>         | SERS         | 1 ppb As(V)  | Mulvihill, M.; Tao, A.; Benjauthrit, K.; Arnold, J.; Yang, P. <i>Angewandte Chemie (International ed. in English)</i> 2008.                                                                                                                  |
| <b>As(III)</b>                   | SPR          | Below 10 ppb | Forzani, E.; Foley, K.; Westerhoff, P.; Tao, N. <i>Sensors and Actuators B: Chemical</i> 2007                                                                                                                                                |
